# Supplementary material for: Access to Autism Spectrum Disorder Services for Rural Appalachian Citizens
Source: PubMed Central journal article supplement (PMC9138840; doi:10.13023/jah.0201.04), 2020-01-26
Supplement: 1027-T3-Scarpa-2.1.4.pdf [file 1027-T3-Scarpa-2.1.4.pdf]

**TABLE 3: Frequency (%) of items endorsed for Information given by professionals and Barriers to accessing or providing services; Means (SDs) for Importance of intervention targets rated on a 1 (very low) to 5 (very high) scale**

| <b>Item</b>                                                    | <b>Caregivers</b> | <b>Providers</b> |
|----------------------------------------------------------------|-------------------|------------------|
| <b>Information given by professionals following diagnosis:</b> | 40.0%             | n/a              |
|                                                                | 33.3%             | n/a              |
| Gave information about available resources                     | 33.3%             | n/a              |
| Discussed ASD                                                  | 33.3%             | n/a              |
| Referred to ASD specialist                                     | 26.7%             | n/a              |
| Referred to support group                                      | 26.7%             | n/a              |
| Provided literature on ASD                                     | 13.3%             | n/a              |
| Advised on education program                                   | 13.3%             |                  |
| Advised on medical problems                                    |                   |                  |
| Provided no additional information                             |                   |                  |
| <b>Barriers to accessing or providing ASD services:</b>        |                   |                  |
| Few providers available in general                             | 66.7%             | 69.7%            |
| Few providers with ASD knowledge or training                   | 66.7%             | 81.8%            |
| Affordability                                                  | 40.0%             | 63.6%            |
| Geographic location/isolation                                  | 40.0%             | 72.7%            |
| Travel/transportation issues                                   | 26.7%             | 78.8%            |
| Lack of childcare                                              | 20.0%             | 42.4%            |
| Lack of childcare                                              | 6.7%              | 30.3%            |
| Disability                                                     | n/a               | 75.8%            |
| Lack of resources for providers                                |                   |                  |
| <b>Importance of intervention target:</b>                      |                   |                  |
| Social Skills                                                  | 4.80              | 4.68             |
| Communication                                                  | (0.41)            | (.60)            |
| Social Engagement                                              | 4.20              | 4.68             |
| Challenging Behaviors                                          | (1.21)            | (.65)            |
|                                                                | 4.47              | 4.49             |
|                                                                | (0.64)            | (.62)            |
|                                                                | 4.20              | 4.79             |
|                                                                | (1.15)            | (.42)            |
