# Supplementary material for: Access to Autism Spectrum Disorder Services for Rural Appalachian Citizens
Source: PubMed Central journal article supplement (PMC9138840; doi:10.13023/jah.0201.04), 2020-01-26
Supplement: 1027-T4-Scarpa-2.1.4.pdf [file 1027-T4-Scarpa-2.1.4.pdf]

**TABLE 4. Caregiver-Report on Frequency of Use (% of sample endorsing yes), and Availability/Importance of Services; Means (SDs) for Availability / Importance of Services rated on a 1(very low) to 5(very high) scale**

| <i>Intervention Type</i>         | <i>Services Used</i> | <i>Availability M (SD)</i> | <i>Importance M (SD)</i> |
|----------------------------------|----------------------|----------------------------|--------------------------|
| Behavioral treatment             | 53.3%*               | 2.58 (1.56)                | 4.57 (1.09)              |
| <b>Social skills training</b>    | 60.0 %*              | <b>2.08</b> (1.31)         | <b>4.85</b> (0.38)       |
| Speech/language therapy          | 66.7%*               | 3.73 (1.39)                | 4.79 (0.43)              |
| Early intervention               | 26.7%                | 3.2 (1.4)                  | 4.5 (1.09)               |
| Music, dance, art, drama therapy | 13.3%                | 2 (1.25)                   | 4.36 (1.08)              |
| Sensory integration therapy      | 40.0%                | 2.18 (1.47)                | 4.43 (1.15)              |
| Occupational therapy             | 53.3%*               | 3.5 (1.4)                  | 4.79 (0.43)              |
| Physical therapy                 | 33.3%                | 3.55 (1.44)                | 4.57 (0.85)              |
| <b>Vocational training</b>       | 6.7%                 | <b>2.22</b> (1.3)          | <b>4.64</b> (0.63)       |
| Animal therapy                   | 6.7%                 | 2.09 (1.58)                | 4.15 (1.46)              |
| Dietary interventions            | 0.0%                 | 1.7 (1.25)                 | 3.54 (1.71)              |
| Respite care                     | 20.0%                | 2.91 (1.87)                | 4.21 (1.31)              |
| <b>Family support services</b>   | 53.3%*               | <b>2.5</b> (1.73)          | <b>4.57</b> (1.09)       |
| <b>Parent training/coaching</b>  | 33.3%                | <b>2.25</b> (1.42)         | <b>4.57</b> (1.09)       |
| <b>Parent lectures/workshops</b> | 26.7%                | <b>2.17</b> (1.47)         | <b>4.79</b> (0.43)       |
| Medications                      | 60.0%*               | 3.58 (1.68)                | 3.62 (1.61)              |
| Diagnostic services              | 13.3%                | 2.36 (1.43)                | 3.79 (1.63)              |
| Web-based resource network       | 20.0%                | 2.45 (1.44)                | 3.86 (1.61)              |
| Special needs camps              | 13.3%                | 2.27 (1.79)                | 0 (0)                    |

\* = Services ever used by more than 50% of the sample.

Note: Bolded items refer to services rated as **both** highest in importance (Mean  $\geq 4.5$ ) and lowest in availability (Mean  $\leq 2.5$ ).
