# Supplementary material for: Access to Autism Spectrum Disorder Services for Rural Appalachian Citizens
Source: PubMed Central journal article supplement (PMC9138840; doi:10.13023/jah.0201.04), 2020-01-26
Supplement: 1027-T5-Scarpa-2.1.4.pdf [file 1027-T5-Scarpa-2.1.4.pdf]

**TABLE 5. Provider-Report on Availability/Importance of Services; Means (SDs) for Availability/Importance of Services rated on a 1(very low) to 5(very high) scale**

| <i><b>Intervention Type</b></i>        | <i><b>Availability<br/>M (SD)</b></i> | <i><b>Importance<br/>M (SD)</b></i> |
|----------------------------------------|---------------------------------------|-------------------------------------|
| Behavioral treatment                   | 2.72 (1.11)                           | 4.76 (0.44)                         |
| Social skills training                 | 2.69 (0.93)                           | 4.91 (0.29)                         |
| Speech/language therapy                | 3.37 (0.93)                           | 4.82 (0.53)                         |
| Early intervention                     | 3.45 (0.96)                           | 4.79 (0.55)                         |
| Music, dance, art, drama therapy       | 1.63 (0.79)                           | 3.84 (1.02)                         |
| Sensory integration therapy            | 1.90 (1.01)                           | 4.42 (0.75)                         |
| Occupational therapy                   | 3.27 (1.01)                           | 4.64 (0.60)                         |
| Physical therapy                       | 3.42 (0.94)                           | 4.70 (0.47)                         |
| Vocational training                    | 2.45 (1.06)                           | 4.44 (0.84)                         |
| Animal therapy                         | 1.74 (0.68)                           | 3.69 (1.03)                         |
| Dietary interventions                  | 1.67 (0.71)                           | 3.91 (1.06)                         |
| Respite care                           | 1.90 (0.87)                           | 4.16 (1.05)                         |
| <b>Family support services</b>         | <b>2.22 (0.79)</b>                    | <b>4.84 (0.37)</b>                  |
| <b>Parent training/coaching</b>        | <b>2.31 (0.86)</b>                    | <b>4.81 (0.40)</b>                  |
| <b>Parent lectures/workshops</b>       | <b>1.74 (0.73)</b>                    | <b>4.72 (0.52)</b>                  |
| Medications                            | 3.19 (1.05)                           | 4.28 (0.92)                         |
| <b>Diagnostic services</b>             | <b>2.35 (1.20)</b>                    | <b>4.56 (0.67)</b>                  |
| Web-based resource network             | 1.93 (1.03)                           | 3.81 (1.15)                         |
| Special needs camps                    | 1.52 (0.63)                           | 4.34 (0.83)                         |
| <b>Professional/provider trainings</b> | <b>2.03 (0.91)</b>                    | <b>4.66 (0.65)</b>                  |
| <b>Educator trainings</b>              | <b>1.93 (0.94)</b>                    | <b>4.75 (0.62)</b>                  |

Note: Bolded items refer to services rated as **both** highest in importance (Mean  $\geq 4.5$ ) and lowest in availability (Mean  $\leq 2.5$ ).
