# Supplementary material for: Access to Autism Spectrum Disorder Services for Rural Appalachian Citizens
Source: PubMed Central journal article supplement (PMC9138840; doi:10.13023/jah.0201.04), 2020-01-26
Supplement: 1027-T6-Scarpa-2.1.4.pdf [file 1027-T6-Scarpa-2.1.4.pdf]

**TABLE 6. Caregiver- and Provider-Reported Community Barriers to Participating in a Training Hosted by a Non-local Agency; Means (SDs) for Caregiver / Provider rated on a 1(very low) to 5(very high) scale**

| <b>Barriers</b>                                                     | <i>Caregiver<br/>M (SD)</i> | <i>Provider<br/>M (SD)</i> |
|---------------------------------------------------------------------|-----------------------------|----------------------------|
| Attitudes towards seeking help                                      | 1.31<br>(1.11)              | 3.2 (1.02)                 |
| Sense of being criticized or judged as a parent                     | 1.39<br>(0.65)              | 3.15<br>(0.91)             |
| Concerns about privacy                                              | 1.08<br>(0.28)              | 2.70<br>(1.40)             |
| Attitudes towards mental health or ASD                              | 1.08<br>(0.28)              | 2.88<br>(1.01)             |
| Family Issues                                                       | 1.31<br>(0.63)              | 3.71<br>(1.07)             |
| Lack of childcare                                                   | 3 (1.8)                     | 4.16<br>(1.02)             |
| Service provided by "outsiders" who don't understand your community | 1.85<br>(1.14)              | 3.47<br>(1.05)             |
| Religion or specific values/beliefs about parenting                 | 1.15<br>(0.55)              | 2.13<br>(1.09)             |
| Health concerns or issues                                           | 1.54 (1.2)                  | 2.48<br>(1.12)             |
| Location and ability to get to the training                         | 1.93<br>(1.44)              | 4.41<br>(0.71)             |
